# Supplementary material for: Interorgan communication networks in the kidney–lung axis
Source: Springer Nature journal article supplement (doi:10.1038/s41581-023-00760-7), 2023-09-04
Supplement: 41581_2023_760_MOESM1_ESM.pdf [file 41581_2023_760_MOESM1_ESM.pdf]

---

# Interorgan communication networks in the kidney–lung axis

---

In the format provided by the authors and unedited

**Table 1: Synopsis of ICN mediators of AKI-induced remote lung inflammation.**

| ICN Mediator<br>kidney:lung       | Baseline<br>Serum levels | Ischemia<br>reperfusion<br>AKI<br>Serum levels | Bilateral<br>Nephrectomy<br>Serum levels | Onset          | Peak or<br>Nadir                                         | Duration                              | Cellular source                                                                                                                                                                           | Receptors/<br>Target cells                                                          | Mechanisms of action                          |                                               |                                                 | Notes                                                                                       |
|-----------------------------------|--------------------------|------------------------------------------------|------------------------------------------|----------------|----------------------------------------------------------|---------------------------------------|-------------------------------------------------------------------------------------------------------------------------------------------------------------------------------------------|-------------------------------------------------------------------------------------|-----------------------------------------------|-----------------------------------------------|-------------------------------------------------|---------------------------------------------------------------------------------------------|
|                                   |                          |                                                |                                          |                |                                                          |                                       |                                                                                                                                                                                           |                                                                                     | Lung<br>Endothelial<br>leakage                | Lung<br>Neutrophil<br>accumulation            | Lung interstitial<br>macrophage<br>accumulation |                                                                                             |
| Osteopontin                       | Low                      | ↑                                              | N.D.                                     | 0-2 hours      | 12-24 hours                                              | > 5 days                              | Kidney only;<br>distal and proximal tubule;<br>later stages other kidney<br>cell types                                                                                                    | CD44 expressing<br>circulating or lung immune<br>cells                              | +++                                           | +++                                           | +++                                             |                                                                                             |
| αKlotho                           | High                     | ↓                                              | N.D.                                     | 0-3 hours      | N.D.                                                     | 7-10 days                             | Kidney                                                                                                                                                                                    | FGF23/FGFR1 expressing<br>cells?                                                    | +                                             | +                                             | N.D.                                            |                                                                                             |
| Indoxyl sulfate<br>(uremic toxin) | Low                      | ↑                                              | ↑                                        | 0-2 hours      | Depends on<br>degree<br>of<br>proximal<br>tubule<br>loss | Until renal<br>failure is<br>resolved | Gut-liver-derived:<br>Indole is produced by<br>intestinal bacteria as a<br>degradation product of<br>tryptophan, and is<br>subsequently metabolized<br>in the liver<br>to indoxyl sulfate | Endothelial cells,<br>vascular smooth muscle cells,<br>epithelial cells, monocytes? | N.D.                                          | N.D.                                          | N.D.                                            | Induces IL-6<br>expression                                                                  |
| HMBG1                             | Low                      | ↑                                              | ↑                                        | 0-6 hours      | N.D.                                                     | > 1 day                               | Broadly expressed in kidney                                                                                                                                                               | Acts in part via TLR4<br>expressing immune cells                                    | +                                             | +                                             | N.D.                                            |                                                                                             |
| mtDAMPs                           | Very low                 | ↑                                              | N.D.                                     | 0-2 hours      | N.D.                                                     | > 2days                               | Present in all kidney cells                                                                                                                                                               | Acts via TLR9                                                                       | N.D.                                          | N.D.                                          | N.D.                                            |                                                                                             |
| IL-6                              | Very low                 | ↑                                              | ↑                                        | 1-2 hours      | 2 hours                                                  | 6-12 hours                            | Kidney, lung, liver, spleen,<br>intestine                                                                                                                                                 | IL-6R/gp130 expressing cells                                                        | +                                             | +++                                           | N.D.                                            |                                                                                             |
| KC/CXCL1<br>(IL-8 in humans)      | Very low                 | ↑                                              | ↑                                        | 1-2 hours      | 2 hours                                                  | 1 day                                 | Lung endothelial cells ?                                                                                                                                                                  | CXCR2 expressing cells                                                              | +                                             | +++                                           | N.D.                                            | Induced by IL-6<br>together with other<br>unknown<br>AKI/nephrectomy-<br>Induced co-factors |
| TNF                               | Very low                 | ↑                                              | ↑                                        | 1-2 hours      | 2 hours                                                  | 1-2 days                              | Immune cells, macrophages                                                                                                                                                                 | TNFR1 expressing lung<br>endothelial cells;<br>other cell types?                    | +                                             | +++                                           | N.D.                                            |                                                                                             |
| IL-10                             | Very low                 | ↑                                              | ↑                                        | 4 hours        | 8-24 hours                                               | > 1 day                               | Liver, splenic CD4 T cells                                                                                                                                                                | Immune cells ?                                                                      | Decrease<br>by<br>anti-inflammatory<br>action | Decrease<br>by<br>anti-inflammatory<br>action | N.D.                                            | Induced by IL-6;<br>Anti-inflammatory<br>interleukin                                        |
| NETs                              | Very low                 | ↑                                              | N.D.                                     | 15-20<br>hours | N.D.                                                     | N.D.                                  | Neutrophils                                                                                                                                                                               | Unknown                                                                             | N.D.                                          | N.D.                                          | N.D.                                            |                                                                                             |
